# Supplementary material
Source: PubMed Central journal article supplement (PMC2577253)
Supplement: pp.108.125716_1.pdf [file pp.108.125716_1.pdf]

Hs 1 HG SPEGRFHFAIDRGGCTFFDVFACQCPGG--HVRVVKLLSLEDPANVA DAPTEGIRRLLEQEA GMLLPRDQFLDLSH IASIRMGTTVATNALLERKQ  
Bt 1 HG QPGRFHFPAIDRGGCTFFDVFACQCPGG--HVRVVKLLSLEDPANVA DAPTEGIRRLLEQEGGVLLPRDRPLDTSRIASIRMGTTVATNALLERKQ  
Rn 1 HG SPEGRFHFAIDRGGCTFFDVFACQCPGG--HVRVVKLLSLEDPANVA DAPTEGIRRLLEQEGGVLLPRDRPLDTSRIASIRMGTTVATNALLERKQ  
Mm 1 HG SPEGRFHFAIDRGGCTFFDVFACQCPGG--HVRVVKLLSLEDPANVA DAPTEGIRRLLEQEGGVLLPRDRPLDTSRIASIRMGTTVATNALLERKQ  
At 1 HG VIEGKLFRCIDRGGCTFFDVFACQCPGG--HVRVVKLLSLEDPANVA DAPTEGIRRLLEQEGGVLLPRDRPLDTSRIASIRMGTTVATNALLERKQ

Hs 94 ERVALLVTRGFRDLDLHGTOARQDFDLAVPMPPEVLYERVLEVDERVLYHR--GGAGGCTPVKGR TGDLLLEVQVQVVDL GRLRGKLEGLLSRGIIS  
Bt 94 ERVALLVTRGFRDLDLHGTOARQDFDLAVPMPPEVLYERVLEVDERVLYHR--GGAGGCTPVKGR TGDLLLEVQVQVVDL GRLRGKLEGLLSRGIIS  
Rn 94 ERVALLVTRGFRDLDLHGTOARQDFDLAVPMPPEVLYERVLEVDERVLYHR--GGAGGCTPVKGR TGDLLLEVQVQVVDL GRLRGKLEGLLSRGIIS  
Mm 94 ERVALLVTRGFRDLDLHGTOARQDFDLAVPMPPEVLYERVLEVDERVLYHR--GGAGGCTPVKGR TGDLLLEVQVQVVDL GRLRGKLEGLLSRGIIS  
At 96 ERVALLVTRGFRDLDLHGTOARQDFDLAVPMPPEVLYERVLEVDERVLYHR--GGAGGCTPVKGR TGDLLLEVQVQVVDL GRLRGKLEGLLSRGIIS

Hs 187 LAVVLRHSYTWAOHEQQVGV LARLELGFTHVLSLSSAMPVVRVPRGHGTACADAAYLTPA IQRVYVQGFGRGFGGQLKDVQVLFMRSDGGGLAPDITFS  
Bt 187 LAVVLRHSYTWAOHEQQVGV LARLELGFTHVLSLSSAMPVVRVPRGHGTACADAAYLTPA IQRVYVQGFGRGFGGQLKDVQVLFMRSDGGGLAPDITFS  
Rn 187 LAVVLRHSYTWAOHEQQVGV LARLELGFTHVLSLSSAMPVVRVPRGHGTACADAAYLTPA IQRVYVQGFGRGFGGQLKDVQVLFMRSDGGGLAPDITFS  
Mm 187 LAVVLRHSYTWAOHEQQVGV LARLELGFTHVLSLSSAMPVVRVPRGHGTACADAAYLTPA IQRVYVQGFGRGFGGQLKDVQVLFMRSDGGGLAPDITFS  
At 191 LAVVLRHSYTWAOHEQQVGV LARLELGFTHVLSLSSAMPVVRVPRGHGTACADAAYLTPA IQRVYVQGFGRGFGGQLKDVQVLFMRSDGGGLAPDITFS

Hs 282 GSRAVLSGPPAGGVVGYEATTV QEGGQPVIGFDGGTSTDVSRVYAGEFEHVFEASTAGVTLQAPQLDINTVAAGGCSRLFFRSGLFVVGESAGA  
Bt 282 GSRAVLSGPPAGGVVGYEATTV QEGGQPVIGFDGGTSTDVSRVYAGEFEHVFEASTAGVTLQAPQLDINTVAAGGCSRLFFRSGLFVVGESAGA  
Rn 282 GSRAVLSGPPAGGVVGYEATTV QEGGQPVIGFDGGTSTDVSRVYAGEFEHVFEASTAGVTLQAPQLDINTVAAGGCSRLFFRSGLFVVGESAGA  
Mm 282 GSRAVLSGPPAGGVVGYEATTV QEGGQPVIGFDGGTSTDVSRVYAGEFEHVFEASTAGVTLQAPQLDINTVAAGGCSRLFFRSGLFVVGESAGA  
At 286 GSKAVLSGPPAGGVVGYEATTV QEGGQPVIGFDGGTSTDVSRVYAGEFEHVFEASTAGVTLQAPQLDINTVAAGGCSRLFFRSGLFVVGESAGA

Hs 377 HPGPACVYRKGQGVVYTDANLVLCRLLPASPFCIFGPGCRNQLSPSEASRRKALRAVAE VNSFLTNGPCPASLS LEVANGFVRVANEAMCRPIRA  
Bt 377 HPGPACVYRKGQGVVYTDANLVLCRLLPASPFCIFGPGCRNQLSPSEASRRKALRAVAE VNSFLTNGPCPASLS LEVANGFVRVANEAMCRPIRA  
Rn 377 HPGPACVYRKGQGVVYTDANLVLCRLLPASPFCIFGPGCRNQLSPSEASRRKALRAVAE VNSFLTNGPCPASLS LEVANGFVRVANEAMCRPIRA  
Mm 377 HPGPACVYRKGQGVVYTDANLVLCRLLPASPFCIFGPGCRNQLSPSEASRRKALRAVAE VNSFLTNGPCPASLS LEVANGFVRVANEAMCRPIRA  
At 381 HPGPACVYRKGQGVVYTDANLVLCRLLPASPFCIFGPGCRNQLSPSEASRRKALRAVAE VNSFLTNGPCPASLS LEVANGFVRVANEAMCRPIRA

Hs 472 LTOARGHDPSSAHVLAACFGGAGGQHACATARALGMDTVHHRSSGLSALGLALADVVEHAQEPSCS LVAPETFVQLDQRLSLREEQCVDALQAQG  
Bt 472 LTOARGHDPSSAHVLAACFGGAGGQHACATARALGMDTVHHRSSGLSALGLALADVVEHAQEPSCS LVAPETFVQLDQRLSLREEQCVDALQAQG  
Rn 472 LTOARGHDPSSAHVLAACFGGAGGQHACATARALGMDTVHHRSSGLSALGLALADVVEHAQEPSCS LVAPETFVQLDQRLSLREEQCVDALQAQG  
Mm 472 LTOARGHDPSSAHVLAACFGGAGGQHACATARALGMDTVHHRSSGLSALGLALADVVEHAQEPSCS LVAPETFVQLDQRLSLREEQCVDALQAQG  
At 476 LTRMKGHSTXNHNLAACFGGAGGQHACATARALGMDTVHHRSSGLSALGLALADVVEHAQEPSCS LVAPETFVQLDQRLSLREEQCVDALQAQG

Hs 567 PFRSQISTEFLHRLRYGQDTCALMVSAHQHPATA SPRAGDGGAAFPVRYHREFGFV IERPVVYVDDVVRVGTGRSGSL LEDPKAKGQGFPPVUDR  
Bt 567 PFRSQISTEFLHRLRYGQDTCALMVSAHQHPATA SPRAGDGGAAFPVRYHREFGFV IERPVVYVDDVVRVGTGRSGSL LEDPKAKGQGFPPVUDR  
Rn 567 PFRSQISTEFLHRLRYGQDTCALMVSAHQHPATA SPRAGDGGAAFPVRYHREFGFV IERPVVYVDDVVRVGTGRSGSL LEDPKAKGQGFPPVUDR  
Mm 567 PFRSQISTEFLHRLRYGQDTCALMVSAHQHPATA SPRAGDGGAAFPVRYHREFGFV IERPVVYVDDVVRVGTGRSGSL LEDPKAKGQGFPPVUDR  
At 571 PFDGNISTETXNHNLAACFGGAGGQHACATARALGMDTVHHRSSGLSALGLALADVVEHAQEPSCS LVAPETFVQLDQRLSLREEQCVDALQAQG

Hs 662 WTCYFEGGQVETPVYVLDLGLGCHQLGQPCLLIINNSTILVEPQCAEVTGCDRISVGAZVP--GTVQFQLDPIQLSIFSHRPFMSIARQNR  
Bt 662 WTCYFEGGQVETPVYVLDLGLGCHQLGQPCLLIINNSTILVEPQCAEVTGCDRISVGAZVP--GTVQFQLDPIQLSIFSHRPFMSIARQNR  
Rn 662 WTCYFEGGQVETPVYVLDLGLGCHQLGQPCLLIINNSTILVEPQCAEVTGCDRISVGAZVP--GTVQFQLDPIQLSIFSHRPFMSIARQNR  
Mm 662 WTCYFEGGQVETPVYVLDLGLGCHQLGQPCLLIINNSTILVEPQCAEVTGCDRISVGAZVP--GTVQFQLDPIQLSIFSHRPFMSIARQNR  
At 662 HYKVFYEGGQVETPVYVLDLGLGCHQLGQPCLLIINNSTILVEPQCAEVTGCDRISVGAZVP--GTVQFQLDPIQLSIFSHRPFMSIARQNR

Hs 755 ILQRTAISTNKEKRLDFSCALFQPDGGGLVSNAPHVPHLGAHQETVQFQIQHGLADLHPGDVLLSNHPSAGGSHLPDLTVITPVFVFPQTRPVFY  
Bt 755 ILQRTAISTNKEKRLDFSCALFQPDGGGLVSNAPHVPHLGAHQETVQFQIQHGLADLHPGDVLLSNHPSAGGSHLPDLTVITPVFVFPQTRPVFY  
Rn 755 ILQRTAISTNKEKRLDFSCALFQPDGGGLVSNAPHVPHLGAHQETVQFQIQHGLADLHPGDVLLSNHPSAGGSHLPDLTVITPVFVFPQTRPVFY  
Mm 755 ILQRTAISTNKEKRLDFSCALFQPDGGGLVSNAPHVPHLGAHQETVQFQIQHGLADLHPGDVLLSNHPSAGGSHLPDLTVITPVFVFPQTRPVFY  
At 757 ILQRTAISTNKEKRLDFSCALFQPDGGGLVSNAPHVPHLGAHQETVQFQIQHGLADLHPGDVLLSNHPSAGGSHLPDLTVITPVFVFPQTRPVFY

Hs 850 VASRGHADIGGIIFPGSNPPHSTLQQEGAVPLSPKLVGGVQFQEAFAVTEALRAPC--KIFGCSCTRNLHDNLSDLRAQVAANQKGLVGLGELI  
Bt 850 VASRGHADIGGIIFPGSNPPHSTLQQEGAVPLSPKLVGGVQFQEAFAVTEALRAPC--KIFGCSCTRNLHDNLSDLRAQVAANQKGLVGLGELI  
Rn 850 VASRGHADIGGIIFPGSNPPHSTLQQEGAVPLSPKLVGGVQFQEAFAVTEALRAPC--KIFGCSCTRNLHDNLSDLRAQVAANQKGLVGLGELI  
Mm 850 VASRGHADIGGIIFPGSNPPHSTLQQEGAVPLSPKLVGGVQFQEAFAVTEALRAPC--KIFGCSCTRNLHDNLSDLRAQVAANQKGLVGLGELI  
At 850 VASRGHADIGGIIFPGSNPPHSTLQQEGAVPLSPKLVGGVQFQEAFAVTEALRAPC--KIFGCSCTRNLHDNLSDLRAQVAANQKGLVGLGELI

Hs 942 GQVGLDVVQAVYMGHIQANAELAVRDMRLRAFQ-----TSRQARGLPLEVAEDHMDGSPICLRVQINLQSGS AVFDFPSGSGSEVFGNLNAPRAI  
Bt 942 GQVGLDVVQAVYMGHIQANAELAVRDMRLRAFQ-----TSRQARGLPLEVAEDHMDGSPICLRVQINLQSGS AVFDFPSGSGSEVFGNLNAPRAI  
Rn 942 GQVGLDVVQAVYMGHIQANAELAVRDMRLRAFQ-----TSRQARGLPLEVAEDHMDGSPICLRVQINLQSGS AVFDFPSGSGSEVFGNLNAPRAI  
Mm 942 GQVGLDVVQAVYMGHIQANAELAVRDMRLRAFQ-----TSRQARGLPLEVAEDHMDGSPICLRVQINLQSGS AVFDFPSGSGSEVFGNLNAPRAI  
At 945 GQVGLDVVQAVYMGHIQANAELAVRDMRLRAFQ-----TSRQARGLPLEVAEDHMDGSPICLRVQINLQSGS AVFDFPSGSGSEVFGNLNAPRAI

Hs 1031 TLSALIYCLRCLVGRDIPLNQGLCLAPVRYVIFPKGSILDPSPFAAVVGGNVLTQRVVVDVILGAFGACAAASGCGNHNVTLGNAMGYYETVAGGAG  
Bt 1031 TLSALIYCLRCLVGRDIPLNQGLCLAPVRYVIFPKGSILDPSPFAAVVGGNVLTQRVVVDVILGAFGACAAASGCGNHNVTLGNAMGYYETVAGGAG  
Rn 1031 TLSALIYCLRCLVGRDIPLNQGLCLAPVRYVIFPKGSILDPSPFAAVVGGNVLTQRVVVDVILGAFGACAAASGCGNHNVTLGNAMGYYETVAGGAG  
Mm 1031 TLSALIYCLRCLVGRDIPLNQGLCLAPVRYVIFPKGSILDPSPFAAVVGGNVLTQRVVVDVILGAFGACAAASGCGNHNVTLGNAMGYYETVAGGAG  
At 1040 TFAAVIYCLRCLVGRDIPLNQGLCLAPVRYVIFPKGSILDPSPFAAVVGGNVLTQRVVVDVILGAFGACAAASGCGNHNVTLGNAMGYYETVAGGAG

Hs 1126 AGPQWGHRSQVSHMNTNTRITDPEILSRYPVILRRFELRPSGCGRGRFRGGDGVVRELH FREALLSVLTERRAFPYGLMGGEPGARGLNLLI  
Bt 1126 AGPQWGHRSQVSHMNTNTRITDPEILSRYPVILRRFELRPSGCGRGRFRGGDGVVRELH FREALLSVLTERRAFPYGLMGGEPGARGLNLLI  
Rn 1126 AGPQWGHRSQVSHMNTNTRITDPEILSRYPVILRRFELRPSGCGRGRFRGGDGVVRELH FREALLSVLTERRAFPYGLMGGEPGARGLNLLI  
Mm 1126 AGPQWGHRSQVSHMNTNTRITDPEILSRYPVILRRFELRPSGCGRGRFRGGDGVVRELH FREALLSVLTERRAFPYGLMGGEPGARGLNLLI  
At 1135 AGPQWGHRSQVSHMNTNTRITDPEILSRYPVILRRFELRPSGCGRGRFRGGDGVVRELH FREALLSVLTERRAFPYGLMGGEPGARGLNLLI

Hs 1221 RKGDRVTNLCGKTSVTVYVPGDFVCLHTFGGGGQYDPEDFAPPFGSPLQALAFPERGSSVYERRAQEA  
Bt 1221 RKGDRVTNLCGKTSVTVYVPGDFVCLHTFGGGGQYDPEDFAPPFGSPLQALAFPERGSSVYERRAQEA  
Rn 1221 RKGDRVTNLCGKTSVTVYVPGDFVCLHTFGGGGQYDPEDFAPPFGSPLQALAFPERGSSVYERRAQEA  
Mm 1221 RKGDRVTNLCGKTSVTVYVPGDFVCLHTFGGGGQYDPEDFAPPFGSPLQALAFPERGSSVYERRAQEA  
At 1230 TKDRRIYVLCGRNRVVEAQLGQLHTFGGGGQYDPEDFAPPFGSPLQALAFPERGSSVYERRAQEA
