# Supplementary material
Source: PubMed Central journal article supplement (PMC2577253)
Supplement: pp.108.125716_2.pdf [file pp.108.125716_2.pdf]

A

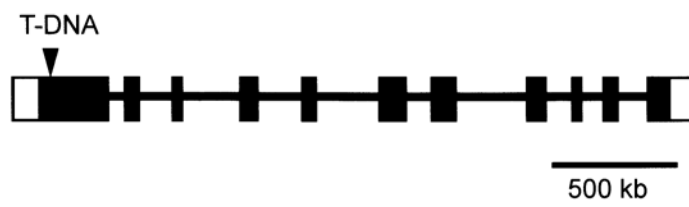

B

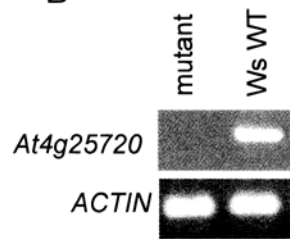

D

| Line                    | 5OP<br>( $\mu\text{mol g}^{-1}$ fresh weight) |
|-------------------------|-----------------------------------------------|
| <i>oxp1-2</i>           | $1.35 \pm 0.10$                               |
| <i>At4g25720/oxp1-2</i> | $1.32 \pm 0.06$                               |

C

| Line             | GGC activity ( $\text{nmol mg}^{-1}$ protein $\text{min}^{-1}$ ) |                   |
|------------------|------------------------------------------------------------------|-------------------|
|                  | with GSH                                                         | with $\gamma$ -EC |
| WsWT             | $0.057 \pm 0.005$                                                | $0.063 \pm 0.005$ |
| <i>At4g25720</i> | $0.060 \pm 0.003$                                                | $0.065 \pm 0.006$ |
