# Supplementary material
Source: PubMed Central journal article supplement (PMC2577253)
Supplement: pp.108.125716_4.pdf [file pp.108.125716_4.pdf]

## **SUPPLEMENTAL MATERIALS**

Figure S1 Alignment of translated sequence of Arabidopsis *OXPI* gene and protein sequences of 5OPase from animals.

Figure S2 At4g25720 (QCT) knockout mutants

Figure S3 Detection of 5OP using HPLC.
