# Supplementary material
Source: PubMed Central journal article supplement (PMC2577253)
Supplement: pp.108.125716_5.pdf [file pp.108.125716_5.pdf]

## SUPPLEMENTAL MATERIALS

Table S1.  $\gamma$ -glutamyl transferase activity in wild type and *ggt* mutants.

Leaves were removed from 3-week-old soil grown Arabidopsis plants and 200 mg of tissue was ground in 0.4 ml of cold 1 M NaCl, 100 mM Tris-HCl, pH 8.0, 1 mM benzamidine, 1 mM 6-amino-n-hexanoic acid, 1 mM phenylmethylsulfonyl fluoride (PMSF), 1 mM leupeptin 0.1% Triton X-100, and 1 mg of polyvinylpolypyrrolidone (PVPP) using a microcentrifuge tube and pestle (Martin and Slovin, 2000, Ohkama-Ohtsu et al., 2007a). The solution was cleared by centrifugation at 16,000 g for 15 min at 4°C. The supernatant was assayed for GGT activity using 100 mM Tris-HCl (pH 8.0), 5 mM  $\gamma$ -glutamyl-p-nitroanilide hydrochloride ( $\gamma$ -GPNA) and 100 mM glycylglycine by recording the change at 410 nm for 10 min at room temperature in a 1 ml reaction volume where the reaction was initiated by adding 10 to 50  $\mu$ l of the supernatant. No activity was detectable in leaves of the *ggt1/ggt4* double mutant and we estimate the sensitivity of this assay at 0.1 nmoles  $\text{mg}^{-1}$  protein  $\text{min}^{-1}$ . Some of the data in this table has been published previously (Ohkama-Ohtsu et al., 2007a,b).

| <u>Line</u>      | <u>GGT activity</u><br>(nmole $\text{mg}^{-1}$ protein $\text{min}^{-1}$ ) |
|------------------|----------------------------------------------------------------------------|
| Wildtype         | $8.5 \pm 0.6$                                                              |
| <i>ggt1</i>      | $0.8 \pm 0.4$                                                              |
| <i>ggt4</i>      | $7.8 \pm 0.2$                                                              |
| <i>ggt1/ggt4</i> | <0.1                                                                       |
