# Supplementary material
Source: PubMed Central journal article supplement (PMC2577253)

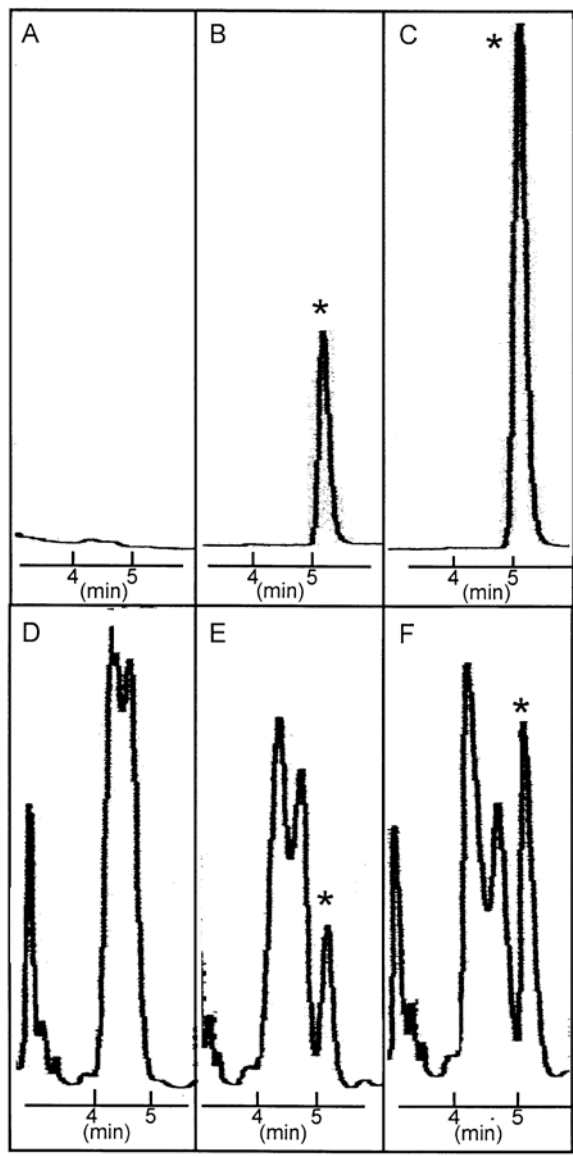

Supplement: pp.108.125716_3.pdf [file pp.108.125716_3.pdf]
